# Supplementary material for: The use of MgO–ZnO ceramics to record pressure and temperature conditions in the piston–cylinder apparatus
Source: Copernicus journal article supplement (doi:10.5194/ejm-36-473-2024), 2024-06-14
Supplement: Supplementary file 1 [file ejm-36-473-2024-supplement.zip]

Archive with 2 entries (2 files):
- ejm-36-473-2024-supplement-title-page.pdf
- MgOZnO_calculator_EJM-2023_87.xls
