# Supplementary material for: The use of MgO–ZnO ceramics to record pressure and temperature conditions in the piston–cylinder apparatus
Source: Copernicus journal article supplement (doi:10.5194/ejm-36-473-2024), 2024-06-14
Supplement: Supplementary file 1 [file ejm-36-473-2024-supplement.zip › ejm-36-473-2024-supplement-title-page.pdf]

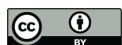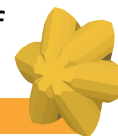

*Supplement of*

## **The use of MgO–ZnO ceramics to record pressure and temperature conditions in the piston–cylinder apparatus**

**Nicholas Farmer and Hugh St. C. O'Neill**

*Correspondence to:* Nicholas Farmer ([nick.farmer@csiro.au](mailto:nick.farmer@csiro.au))

- [ejm-36-473-2024-supplement-title-page.pdf](#)
- [MgOZnO\\_calculator\\_EJM-2023\\_87.xls](#)

The copyright of individual parts of the supplement might differ from the article licence.
