# Supplementary material for: The use of MgO–ZnO ceramics to record pressure and temperature conditions in the piston–cylinder apparatus
Source: Copernicus journal article supplement (doi:10.5194/ejm-36-473-2024), 2024-06-14
Supplement: Supplementary file 1 [file MgOZnO_calculator_EJM-2023_87.xls]

## Sheet: Instructions
Calculator for the rock salt + wurtzite (MgO-ZnO) pressure sensor
Supplement to Farmer and O'Neill, Eur. J. Mineral., "The use of MgO-ZnO ceramics to record pressure and temperature conditions in the piston-cylinder apparatus", 2024
The calcualtions use two VBA macros, requiring a version of Excel which implements VBA
1) MgOZnO_P_calculator	Calculates P given T, XZn(rs) and XZn(wz)
	Input temperature and compositions in columns B to G as indicated
	Up to 100 entries are allowed by the formatting (easily changed)
	The average value of the weighted sum of squares should be 2 (chi-square with two degrees of freedom)
	The probability of having a value larger than 9.2 by chance is only 1%, but the calculation depends on the input incertainties being accurate - which is problematic
	Nevertheless, values larger than, say, 10, may indicate disequilibrium or wrong temperature.
2) MgOZnO_T_calculator	Calculates T given P, XZn(rs) and XZn(wz)
	Input pressure and compositions in columns B to G as indicated
	Up to 100 entries are allowed by the formatting (easily changed)
	The miscibility gap is too sensitive to pressure to make a useful temperature sensor if pressure is uncertain.
	However, for it is precise enoughlto measure temperarature gradients if pressure can assumed to be constant.
	To run a VBA program:
	Mac	Make sure you are on the right worksheet
		Input the necessary data
		Go to "Tools", click "Macro" then "Macros"
		Highlight the appropriate macro: "MgOZnO_P_calculator" or "MgOZnO_T_calculator"
		Click on "Run"
	Windows	Make sure you are on the right worksheet
		Input the necessary data
		Go to "View", click the "Macros" icon			(if you have clicked the down arrow below the "Macros" icon, click "View Macros"
		Highlight the appropriate macro: "MgOZnO_P_calculator" or "MgOZnO_T_calculator"
		Click on "Run"
Calculations on the sheet 'XZn from T and P' do not require Macros. If you are unable to use Macros, then you may be able to use the 'solver' addon on values in columns B or C of this sheet to find the pressure and/or temperature of your experiment.
For details of this thermodynamic model, please see Famer and O'Neill, Eur. J. Mineral., 35, 1051–1071, 2023 (https://doi.org/10.5194/ejm-35-1051-2023)

## Sheet: 1) P from T and Xs
Thermodynamic data				Cp
	∆H	S	V	a	b	c	d	alpha o	k0	k'	k''	no. atoms
rs-MgO	-601.55	26.5	1.125	0.0605	3.62e-07	-535.8	-0.2992	3.11e-05	1616	3.95	-0.0024	2		values highlighted in yellow were refined by fitting to the experiments
w-MgO	-577.88	29.28	1.291	0.0631	9.73e-07	-260	-0.381	3.78e-05	1521	3.775	-0.00248	2
rs-ZnO	-335.69	44.71	1.179	0.0614	7.22e-06	-17.09	-0.3983	5.2e-05	1910	3.54	-0.001853	2
w-ZnO	-350.5	43.16	1.434	0.0435	7.658e-06	-757.3	0.05456	4.45e-05	1426	3.6	-0.00252	2
	Inputs							Results
	T (ºC)	s(T)	XZn rs	s(XZn rs)	XZn wz	s(XZn wz)		P (in kb)	s(P)	XZn rs (calc)	XZn wz (calc)	wt'd sum sq
	1200	5	0.623	0.005	0.944	0.002		24.3887	0.324643	0.623098	0.94413	0.00159475
	1400	5	0.727	0.002	0.945	0.001		25.8282	0.161305	0.72509	0.947222	5.00003
	1000	5	0.658	0.004	0.972	0.003		32.036	0.270729	0.658698	0.969029	1.14793
	1200	5	0.708	0.003	0.96	0.003		29.945	0.221781	0.708121	0.960163	0.00025462

## Sheet: 2) T from P and Xs
Thermodynamic data				Cp
	∆H	S	V	a	b	c	d	alpha o	k0	k'	k''	no. atoms
rs-MgO	-601.55	26.5	1.125	0.0605	3.62e-07	-535.8	-0.2992	3.11e-05	1616	3.95	-0.0024	2
w-MgO	-577.88	29.28	1.291	0.0631	9.73e-07	-260	-0.381	3.78e-05	1521	3.775	-0.00248	2
rs-ZnO	-335.69	44.71	1.179	0.0614	7.22e-06	-17.09	-0.3983	5.2e-05	1910	3.54	-0.001853	2
w-ZnO	-350.5	43.16	1.434	0.0435	7.658e-06	-757.3	0.05456	4.45e-05	1426	3.6	-0.00252	2
	Inputs							Results
	P (kb)	s(P)	XZn rs	s(XZn rs)	XZn wz	s(XZn wz)		T(ºC)	s(T)	XZn rs (calc)	XZn wz (calc)	wt'd sum sq
	20	0.1	0.3	0.002	0.98	0.002		839.454	4.55808	0.300083	0.979174	0.264937
	34.2	0.1	0.783228	0.002	0.972358	0.002		1473.51	6.49718	0.783438	0.972361	0.0205367
	18	0.1	0.53856	0.002	0.924796	0.002		1473.42	6.30036	0.538716	0.924773	0.0184332
	26	0.1	0.729032	0.002	0.94835	0.002		1673.52	6.3319	0.72924	0.948357	0.0201009
	25	0.1	0.713515	0.002	0.944641	0.002		1673.51	6.33771	0.71372	0.944646	0.0199325
	27	0.1	0.74482	0.002	0.952019	0.002		1673.52	6.31886	0.745032	0.952027	0.0202992
	28	0.1	0.760885	0.002	0.955648	0.002		1673.52	6.30037	0.7611	0.955659	0.0204875
	24	0.1	0.698266	0.002	0.940891	0.002		1673.51	6.35239	0.698467	0.940894	0.0197528
	23	0.1	0.683281	0.002	0.9371	0.002		1673.5	6.38205	0.683477	0.937101	0.019562
	22	0.1	0.668555	0.002	0.933266	0.002		1673.5	6.3987	0.668748	0.933265	0.0193603
	21	0.1	0.654085	0.002	0.92939	0.002		1673.49	6.41634	0.654273	0.929387	0.0191479
	20	0.1	0.639866	0.002	0.92547	0.002		1673.49	6.44337	0.64005	0.925465	0.0189608
	19	0.1	0.551508	0.002	0.928015	0.002		1473.43	6.29858	0.551669	0.927993	0.018597
	20	0.1	0.564717	0.002	0.931193	0.002		1473.44	6.29099	0.564881	0.931173	0.0187829
	22	0.1	0.591933	0.002	0.937431	0.002		1473.45	6.2908	0.592105	0.937414	0.0191167

## Sheet: XZn from T and P
Thermodynamic data
				Cp
	∆H	S	V	a	b	c	d	alpha o	k0	k'	k''	n
												(no. of atoms)
rs-MgO	-601.55	26.5	1.125	0.0605	3.62e-07	-535.8	-0.2992	3.11e-05	1616	3.95	-0.0024	2
w-MgO	-577.88	29.28	1.291	0.0631	9.73e-07	-260	-0.381	3.78e-05	1521	3.775	-0.00248	2
rs-ZnO	-335.69	44.71	1.179	0.0614	7.22e-06	-17.09	-0.3983	5.2e-05	1910	3.54	-0.001853	2
w-ZnO	-350.5	43.16	1.434	0.0435	7.658e-06	-757.3	0.05456	4.45e-05	1426	3.6	-0.00252	2
													rs-MgO													wz-MgO																rs-ZnO
	Input					Calculated compositions							HT-H	ST-S	G function	Int VdP										HT-H	ST-S	G function	Int VdP													HT-H	ST-S	G function	Int VdP
	T (ºC)	Pressure (kb)		T (K)		XZn rs calc	XZn wz calc									a	b	c	theta	xi0	Pth	V	PV corr factor	G(P,T)-G(1,T)	G function				a	b	c	theta	xi0	Pth	V	PV corr factor	G(P,T)-G(1,T)	G function	∆G(Mg)	K(Mg)					a	b	c	theta	xi0
	500	0.001		773		0.116915	0.96824						21.4175	42.1298	-633183	4.61926	0.00292916	0.0457345	540.173	0.765916	28.1337	1.14548	1.0182	0.00114548	-633182	21.6522	42.6276	-611812	4.7611	0.00300129	0.0460103	504.554	0.791812	31.5308	1.31918	1.02183	0.00131918	-611811	-21371.2	27.8046		22.5699	44.3791	-381986	4.53651	0.00226155	0.0510315	369.37	0.881237
	600	0.001		873		0.151218	0.953232						26.3744	48.1592	-640353	4.61926	0.00292916	0.0457345	540.173	0.765916	34.4641	1.15035	1.02254	0.00115035	-640352	26.6751	48.737	-619314	4.7611	0.00300129	0.0460103	504.554	0.791812	38.5679	1.32589	1.02702	0.00132589	-619312	-21039.5	18.1489		27.9126	50.8768	-391225	4.53651	0.00226155	0.0510315	369.37	0.881237
	700	0.001		973		0.185445	0.936947						31.4096	53.6191	-648096	4.61926	0.00292916	0.0457345	540.173	0.765916	40.8412	1.15537	1.027	0.00115537	-648095	31.7897	54.283	-627397	4.7611	0.00300129	0.0460103	504.554	0.791812	45.6503	1.33281	1.03239	0.00133281	-627396	-20699.5	12.9187		33.4055	56.8324	-401085	4.53651	0.00226155	0.0510315	369.37	0.881237
	800	0.001		1073		0.218994	0.920204						36.5096	58.6079	-656361	4.61926	0.00292916	0.0457345	540.173	0.765916	47.2523	1.16053	1.03158	0.00116053	-656360	36.9828	59.3627	-636011	4.7611	0.00300129	0.0460103	504.554	0.791812	52.7655	1.33995	1.03792	0.00133995	-636009	-20350.6	9.78748		39.0368	62.3404	-411518	4.53651	0.00226155	0.0510315	369.37	0.881237
	900	0.001		1173		0.251598	0.903646						41.6646	63.201	-665105	4.61926	0.00292916	0.0457345	540.173	0.765916	53.6887	1.16582	1.03629	0.00116582	-665104	42.2442	64.0505	-645113	4.7611	0.00300129	0.0460103	504.554	0.791812	59.9054	1.34731	1.04362	0.00134731	-645111	-19992.4	7.7672		44.7974	67.4726	-422483	4.53651	0.00226155	0.0510315	369.37	0.881237
	1000	0.001		1273		0.283203	0.887757						46.8672	67.4571	-674290	4.61926	0.00292916	0.0457345	540.173	0.765916	60.1447	1.17126	1.04112	0.00117126	-674289	47.5661	68.4042	-654666	4.7611	0.00300129	0.0460103	504.554	0.791812	67.0642	1.35489	1.04949	0.00135489	-654664	-19624.6	6.38614		50.6801	72.2847	-433944	4.53651	0.00226155	0.0510315	369.37	0.881237
	1100	0.001		1373		0.313889	0.872892						52.1118	71.4229	-683886	4.61926	0.00292916	0.0457345	540.173	0.765916	66.6159	1.17685	1.04609	0.00117685	-683885	52.9423	72.4695	-664640	4.7611	0.00300129	0.0460103	504.554	0.791812	74.2377	1.3627	1.05554	0.0013627	-664638	-19246.9	5.39787		56.6791	76.8207	-445873	4.53651	0.00226155	0.0510315	369.37	0.881237
	1200	0.001		1473		0.343817	0.859311						57.3935	75.136	-693866	4.61926	0.00292916	0.0457345	540.173	0.765916	73.0994	1.18258	1.05118	0.00118258	-693865	58.3677	76.2835	-675007	4.7611	0.00300129	0.0460103	504.554	0.791812	81.4231	1.37076	1.06178	0.00137076	-675006	-18859.2	4.66407		62.7896	81.1161	-458242	4.53651	0.00226155	0.0510315	369.37	0.881237
	1300	0.001		1573		0.373201	0.847212						62.7087	78.6271	-704206	4.61926	0.00292916	0.0457345	540.173	0.765916	79.5927	1.18847	1.05642	0.00118847	-704205	63.8383	79.8766	-685745	4.7611	0.00300129	0.0460103	504.554	0.791812	88.618	1.37907	1.06822	0.00137907	-685744	-18461.4	4.10241		69.0077	85.2	-471031	4.53651	0.00226155	0.0510315	369.37	0.881237
	1400	0.001		1673		0.402289	0.836757						68.0543	81.9218	-714885	4.61926	0.00292916	0.0457345	540.173	0.765916	86.0942	1.19453	1.0618	0.00119453	-714884	69.3505	83.2739	-696832	4.7611	0.00300129	0.0460103	504.554	0.791812	95.8208	1.38765	1.07486	0.00138765	-696831	-18053.3	3.66147		75.3301	89.0964	-484218	4.53651	0.00226155	0.0510315	369.37	0.881237
	1500	0.001		1773		0.431361	0.828091						73.4278	85.0412	-725885	4.61926	0.00292916	0.0457345	540.173	0.765916	92.6024	1.20075	1.06733	0.00120075	-725884	74.9014	86.4963	-708250	4.7611	0.00300129	0.0460103	504.554	0.791812	103.03	1.39652	1.08173	0.00139652	-708249	-17634.9	3.3078		81.7539	92.8254	-497786	4.53651	0.00226155	0.0510315	369.37	0.881237
	1600	0.001		1873		0.460726	0.821366						78.8268	88.0035	-737188	4.61926	0.00292916	0.0457345	540.173	0.765916	99.1163	1.20715	1.07302	0.00120715	-737187	80.4885	89.5618	-719982	4.7611	0.00300129	0.0460103	504.554	0.791812	110.245	1.40568	1.08883	0.00140568	-719981	-17206.3	3.01888		88.2766	96.4041	-511720	4.53651	0.00226155	0.0510315	369.37	0.881237
	1700	0.001		1973		0.490734	0.816751						84.2496	90.824	-748781	4.61926	0.00292916	0.0457345	540.173	0.765916	105.635	1.21374	1.07888	0.00121374	-748780	86.1097	92.4855	-732014	4.7611	0.00300129	0.0460103	504.554	0.791812	117.464	1.41517	1.09618	0.00141517	-732012	-16767.3	2.7791		94.8962	99.847	-526005	4.53651	0.00226155	0.0510315	369.37	0.881237
	800	5		1073		0.255748	0.931213						36.5096	58.6079	-656361	4.61926	0.00292916	0.0457345	540.173	0.765916	47.2523	1.16053	1.02978	5.79253	-650569	36.9828	59.3627	-636011	4.7611	0.00300129	0.0460103	504.554	0.791812	52.7655	1.33492	1.03596	6.68713	-629324	-21245	10.8196		39.0368	62.3404	-411518	4.53651	0.00226155	0.0510315	369.37	0.881237
	800	10		1073		0.297974	0.941274						36.5096	58.6079	-656361	4.61926	0.00292916	0.0457345	540.173	0.765916	47.2523	1.1565	1.02801	11.5651	-644796	36.9828	59.3627	-636011	4.7611	0.00300129	0.0460103	504.554	0.791812	52.7655	1.32997	1.03403	13.3493	-622662	-22134.6	11.9542		39.0368	62.3404	-411518	4.53651	0.00226155	0.0510315	369.37	0.881237
	800	15		1073		0.346412	0.950488						36.5096	58.6079	-656361	4.61926	0.00292916	0.0457345	540.173	0.765916	47.2523	1.15253	1.02625	17.318	-639043	36.9828	59.3627	-636011	4.7611	0.00300129	0.0460103	504.554	0.791812	52.7655	1.32512	1.03212	19.987	-616024	-23019.4	13.2005		39.0368	62.3404	-411518	4.53651	0.00226155	0.0510315	369.37	0.881237
	800	20		1073		0.401906	0.958948						36.5096	58.6079	-656361	4.61926	0.00292916	0.0457345	540.173	0.765916	47.2523	1.14864	1.02451	23.0516	-633310	36.9828	59.3627	-636011	4.7611	0.00300129	0.0460103	504.554	0.791812	52.7655	1.32034	1.03023	26.6006	-609410	-23899.4	14.569		39.0368	62.3404	-411518	4.53651	0.00226155	0.0510315	369.37	0.881237
	800	25		1073		0.465405	0.966736						36.5096	58.6079	-656361	4.61926	0.00292916	0.0457345	540.173	0.765916	47.2523	1.14481	1.0228	28.7662	-627595	36.9828	59.3627	-636011	4.7611	0.00300129	0.0460103	504.554	0.791812	52.7655	1.31566	1.02837	33.1906	-602820	-24774.8	16.071		39.0368	62.3404	-411518	4.53651	0.00226155	0.0510315	369.37	0.881237
	800	30		1073		0.537981	0.973925						36.5096	58.6079	-656361	4.61926	0.00292916	0.0457345	540.173	0.765916	47.2523	1.14104	1.0211	34.4621	-621899	36.9828	59.3627	-636011	4.7611	0.00300129	0.0460103	504.554	0.791812	52.7655	1.31105	1.02652	39.7573	-596254	-25645.6	17.7188		39.0368	62.3404	-411518	4.53651	0.00226155	0.0510315	369.37	0.881237
	800	35		1073		0.620837	0.980581						36.5096	58.6079	-656361	4.61926	0.00292916	0.0457345	540.173	0.765916	47.2523	1.13734	1.01942	40.1397	-616222	36.9828	59.3627	-636011	4.7611	0.00300129	0.0460103	504.554	0.791812	52.7655	1.30652	1.0247	46.3012	-589710	-26511.9	19.5257		39.0368	62.3404	-411518	4.53651	0.00226155	0.0510315	369.37	0.881237
	800	40		1073		0.715329	0.986763						36.5096	58.6079	-656361	4.61926	0.00292916	0.0457345	540.173	0.765916	47.2523	1.13369	1.01776	45.7991	-610562	36.9828	59.3627	-636011	4.7611	0.00300129	0.0460103	504.554	0.791812	52.7655	1.30206	1.0229	52.8226	-583188	-27373.8	21.5063		39.0368	62.3404	-411518	4.53651	0.00226155	0.0510315	369.37	0.881237
	800	45		1073		0.822981	0.992523						36.5096	58.6079	-656361	4.61926	0.00292916	0.0457345	540.173	0.765916	47.2523	1.13011	1.01611	51.4408	-604920	36.9828	59.3627	-636011	4.7611	0.00300129	0.0460103	504.554	0.791812	52.7655	1.29767	1.02112	59.3219	-576689	-28231.5	23.6764		39.0368	62.3404	-411518	4.53651	0.00226155	0.0510315	369.37	0.881237
	800	50		1073		0.945503	0.997908						36.5096	58.6079	-656361	4.61926	0.00292916	0.0457345	540.173	0.765916	47.2523	1.12657	1.01449	57.065	-599296	36.9828	59.3627	-636011	4.7611	0.00300129	0.0460103	504.554	0.791812	52.7655	1.29336	1.01936	65.7994	-570211	-29084.9	26.0531		39.0368	62.3404	-411518	4.53651	0.00226155	0.0510315	369.37	0.881237
	1000	5		1273		0.325082	0.90307						46.8672	67.4571	-674290	4.61926	0.00292916	0.0457345	540.173	0.765916	60.1447	1.13217	1.03924	5.84573	-668444	47.5661	68.4042	-654666	4.7611	0.00300129	0.0460103	504.554	0.791812	67.0642	1.34957	1.04742	6.76111	-647905	-20539.8	6.96291		50.6801	72.2847	-433944	4.53651	0.00226155	0.0510315	369.37	0.881237
	1000	10		1273		0.372206	0.917265						46.8672	67.4571	-674290	4.61926	0.00292916	0.0457345	540.173	0.765916	60.1447	1.16704	1.03738	11.6705	-662620	47.5661	68.4042	-654666	4.7611	0.00300129	0.0460103	504.554	0.791812	67.0642	1.34436	1.04538	13.4959	-641170	-21449.7	7.58804		50.6801	72.2847	-433944	4.53651	0.00226155	0.0510315	369.37	0.881237
	1000	15		1273		0.425156	0.93045						46.8672	67.4571	-674290	4.61926	0.00292916	0.0457345	540.173	0.765916	60.1447	1.16289	1.03554	17.4748	-656815	47.5661	68.4042	-654666	4.7611	0.00300129	0.0460103	504.554	0.791812	67.0642	1.33924	1.04337	20.2048	-634461	-22354.5	8.26517		50.6801	72.2847	-433944	4.53651	0.00226155	0.0510315	369.37	0.881237
	1000	20		1273		0.484583	0.942721						46.8672	67.4571	-674290	4.61926	0.00292916	0.0457345	540.173	0.765916	60.1447	1.15882	1.03373	23.2588	-651031	47.5661	68.4042	-654666	4.7611	0.00300129	0.0460103	504.554	0.791812	67.0642	1.33422	1.04138	26.8884	-627777	-23254	8.99833		50.6801	72.2847	-433944	4.53651	0.00226155	0.0510315	369.37	0.881237
	1000	25		1273		0.551205	0.954166						46.8672	67.4571	-674290	4.61926	0.00292916	0.0457345	540.173	0.765916	60.1447	1.15482	1.03193	29.0231	-645267	47.5661	68.4042	-654666	4.7611	0.00300129	0.0460103	504.554	0.791812	67.0642	1.32929	1.03942	33.5472	-621119	-24148.5	9.79186		50.6801	72.2847	-433944	4.53651	0.00226155	0.0510315	369.37	0.881237
	1000	30		1273		0.625814	0.964866						46.8672	67.4571	-674290	4.61926	0.00292916	0.0457345	540.173	0.765916	60.1447	1.15088	1.03016	34.7678	-639522	47.5661	68.4042	-654666	4.7611	0.00300129	0.0460103	504.554	0.791812	67.0642	1.32444	1.03748	40.1815	-614484	-25038	10.6504		50.6801	72.2847	-433944	4.53651	0.00226155	0.0510315	369.37	0.881237
	1000	35		1273		0.709284	0.974893						46.8672	67.4571	-674290	4.61926	0.00292916	0.0457345	540.173	0.765916	60.1447	1.14702	1.0284	40.4933	-633797	47.5661	68.4042	-654666	4.7611	0.00300129	0.0460103	504.554	0.791812	67.0642	1.31968	1.03556	46.7917	-607874	-25922.8	11.5789		50.6801	72.2847	-433944	4.53651	0.00226155	0.0510315	369.37	0.881237
	1000	40		1273		0.802577	0.98431						46.8672	67.4571	-674290	4.61926	0.00292916	0.0457345	540.173	0.765916	60.1447	1.14321	1.02667	46.2	-628090	47.5661	68.4042	-654666	4.7611	0.00300129	0.0460103	504.554	0.791812	67.0642	1.31501	1.03366	53.3784	-601287	-26802.8	12.5827		50.6801	72.2847	-433944	4.53651	0.00226155	0.0510315	369.37	0.881237
	1000	45		1273		0.906753	0.993178						46.8672	67.4571	-674290	4.61926	0.00292916	0.0457345	540.173	0.765916	60.1447	1.13947	1.02495	51.8882	-622402	47.5661	68.4042	-654666	4.7611	0.00300129	0.0460103	504.554	0.791812	67.0642	1.31041	1.03179	59.9419	-594724	-27678.1	13.6676		50.6801	72.2847	-433944	4.53651	0.00226155	0.0510315	369.37	0.881237
	1000	50		1273		1.02298	1.00155						46.8672	67.4571	-674290	4.61926	0.00292916	0.0457345	540.173	0.765916	60.1447	1.1358	1.02325	57.5581	-616732	47.5661	68.4042	-654666	4.7611	0.00300129	0.0460103	504.554	0.791812	67.0642	1.30589	1.02994	66.4826	-588183	-28548.9	14.8396		50.6801	72.2847	-433944	4.53651	0.00226155	0.0510315	369.37	0.881237
	1200	5		1473		0.390356	0.878923						57.3935	75.136	-693866	4.61926	0.00292916	0.0457345	540.173	0.765916	73.0994	1.14168	1.04921	5.90179	-687965	58.3677	76.2835	-675007	4.7611	0.00300129	0.0460103	504.554	0.791812	81.4231	1.36513	1.05959	6.83966	-668168	-19796.9	5.0352		62.7896	81.1161	-458242	4.53651	0.00226155	0.0510315	369.37	0.881237
	1200	10		1473		0.441946	0.89729						57.3935	75.136	-693866	4.61926	0.00292916	0.0457345	540.173	0.765916	73.0994	1.17815	1.04725	11.7816	-682085	58.3677	76.2835	-675007	4.7611	0.00300129	0.0460103	504.554	0.791812	81.4231	1.35961	1.05743	13.6515	-661356	-20728.9	5.43332		62.7896	81.1161	-458242	4.53651	0.00226155	0.0510315	369.37	0.881237
	1200	15		1473		0.499059	0.914518						57.3935	75.136	-693866	4.61926	0.00292916	0.0457345	540.173	0.765916	73.0994	1.1738	1.04533	17.6399	-676226	58.3677	76.2835	-675007	4.7611	0.00300129	0.0460103	504.554	0.791812	81.4231	1.3542	1.0553	20.4359	-654571	-21655.1	5.86016		62.7896	81.1161	-458242	4.53651	0.00226155	0.0510315	369.37	0.881237
	1200	20		1473		0.562218	0.930705						57.3935	75.136	-693866	4.61926	0.00292916	0.0457345	540.173	0.765916	73.0994	1.16953	1.04342	23.477	-670389	58.3677	76.2835	-675007	4.7611	0.00300129	0.0460103	504.554	0.791812	81.4231	1.3489	1.0532	27.1936	-647814	-22575.7	6.31763		62.7896	81.1161	-458242	4.53651	0.00226155	0.0510315	369.37	0.881237
	1200	25		1473		0.63199	0.945943						57.3935	75.136	-693866	4.61926	0.00292916	0.0457345	540.173	0.765916	73.0994	1.16533	1.04154	29.2934	-664573	58.3677	76.2835	-675007	4.7611	0.00300129	0.0460103	504.554	0.791812	81.4231	1.3437	1.05113	33.9251	-641082	-23490.8	6.80776		62.7896	81.1161	-458242	4.53651	0.00226155	0.0510315	369.37	0.881237
	1200	30		1473		0.708992	0.960314						57.3935	75.136	-693866	4.61926	0.00292916	0.0457345	540.173	0.765916	73.0994	1.16122	1.03968	35.0893	-658777	58.3677	76.2835	-675007	4.7611	0.00300129	0.0460103	504.554	0.791812	81.4231	1.33859	1.04908	40.6308	-634377	-24400.5	7.3327		62.7896	81.1161	-458242	4.53651	0.00226155	0.0510315	369.37	0.881237
	1200	35		1473		0.793895	0.973893						57.3935	75.136	-693866	4.61926	0.00292916	0.0457345	540.173	0.765916	73.0994	1.15717	1.03785	40.8652	-653001	58.3677	76.2835	-675007	4.7611	0.00300129	0.0460103	504.554	0.791812	81.4231	1.33358	1.04705	47.3112	-627696	-25305	7.89474		62.7896	81.1161	-458242	4.53651	0.00226155	0.0510315	369.37	0.881237
	1200	40		1473		0.887426	0.98675						57.3935	75.136	-693866	4.61926	0.00292916	0.0457345	540.173	0.765916	73.0994	1.1532	1.03603	46.6214	-647245	58.3677	76.2835	-675007	4.7611	0.00300129	0.0460103	504.554	0.791812	81.4231	1.32866	1.04506	53.9667	-621041	-26204.3	8.4963		62.7896	81.1161	-458242	4.53651	0.00226155	0.0510315	369.37	0.881237
	1200	45		1473		0.990374	0.998947						57.3935	75.136	-693866	4.61926	0.00292916	0.0457345	540.173	0.765916	73.0994	1.14929	1.03424	52.3583	-641508	58.3677	76.2835	-675007	4.7611	0.00300129	0.0460103	504.554	0.791812	81.4231	1.32383	1.04308	60.5979	-614409	-27098.7	9.13995		62.7896	81.1161	-458242	4.53651	0.00226155	0.0510315	369.37	0.881237
	1200	50		1473		1.1036	1.01054						57.3935	75.136	-693866	4.61926	0.00292916	0.0457345	540.173	0.765916	73.0994	1.14545	1.03246	58.0761	-635790	58.3677	76.2835	-675007	4.7611	0.00300129	0.0460103	504.554	0.791812	81.4231	1.31908	1.04113	67.2051	-607802	-27988.1	9.82842		62.7896	81.1161	-458242	4.53651	0.00226155	0.0510315	369.37	0.881237
	1400	5		1673		0.453601	0.860743						68.0543	81.9218	-714885	4.61926	0.00292916	0.0457345	540.173	0.765916	86.0942	1.15163	1.05972	5.96092	-708924	69.3505	83.2739	-696832	4.7611	0.00300129	0.0460103	504.554	0.791812	95.8208	1.38167	1.07254	6.92324	-689909	-19015.4	3.92369		75.3301	89.0964	-484218	4.53651	0.00226155	0.0510315	369.37	0.881237
	1400	10		1673		0.50984	0.883372						68.0543	81.9218	-714885	4.61926	0.00292916	0.0457345	540.173	0.765916	86.0942	1.18986	1.05766	11.8987	-702987	69.3505	83.2739	-696832	4.7611	0.00300129	0.0460103	504.554	0.791812	95.8208	1.37581	1.07025	13.8169	-683015	-19971.2	4.20278		75.3301	89.0964	-484218	4.53651	0.00226155	0.0510315	369.37	0.881237
	1400	15		1673		0.571401	0.904749						68.0543	81.9218	-714885	4.61926	0.00292916	0.0457345	540.173	0.765916	86.0942	1.18528	1.05564	17.8139	-697071	69.3505	83.2739	-696832	4.7611	0.00300129	0.0460103	504.554	0.791812	95.8208	1.37007	1.06798	20.6815	-676151	-20920.8	4.49968		75.3301	89.0964	-484218	4.53651	0.00226155	0.0510315	369.37	0.881237
	1400	20		1673		0.638717	0.924974						68.0543	81.9218	-714885	4.61926	0.00292916	0.0457345	540.173	0.765916	86.0942	1.18079	1.05364	23.7068	-691178	69.3505	83.2739	-696832	4.7611	0.00300129	0.0460103	504.554	0.791812	95.8208	1.36446	1.06576	27.5178	-669314	-21864.1	4.81543		75.3301	89.0964	-484218	4.53651	0.00226155	0.0510315	369.37	0.881237
	1400	25		1673		0.712257	0.944139						68.0543	81.9218	-714885	4.61926	0.00292916	0.0457345	540.173	0.765916	86.0942	1.17639	1.05166	29.5779	-685307	69.3505	83.2739	-696832	4.7611	0.00300129	0.0460103	504.554	0.791812	95.8208	1.35895	1.06356	34.3263	-662506	-22801.4	5.15111		75.3301	89.0964	-484218	4.53651	0.00226155	0.0510315	369.37	0.881237
	1400	30		1673		0.79252	0.96233						68.0543	81.9218	-714885	4.61926	0.00292916	0.0457345	540.173	0.765916	86.0942	1.17207	1.04971	35.4277	-679458	69.3505	83.2739	-696832	4.7611	0.00300129	0.0460103	504.554	0.791812	95.8208	1.35356	1.06139	41.1075	-655725	-23732.9	5.50786		75.3301	89.0964	-484218	4.53651	0.00226155	0.0510315	369.37	0.881237
	1400	35		1673		0.880044	0.979623						68.0543	81.9218	-714885	4.61926	0.00292916	0.0457345	540.173	0.765916	86.0942	1.16784	1.04778	41.2564	-673629	69.3505	83.2739	-696832	4.7611	0.00300129	0.0460103	504.554	0.791812	95.8208	1.34827	1.05925	47.862	-648970	-24658.7	5.88691		75.3301	89.0964	-484218	4.53651	0.00226155	0.0510315	369.37	0.881237
	1400	40		1673		0.975409	0.99609						68.0543	81.9218	-714885	4.61926	0.00292916	0.0457345	540.173	0.765916	86.0942	1.16367	1.04588	47.0645	-667821	69.3505	83.2739	-696832	4.7611	0.00300129	0.0460103	504.554	0.791812	95.8208	1.34308	1.05713	54.5903	-642242	-25578.9	6.28951		75.3301	89.0964	-484218	4.53651	0.00226155	0.0510315	369.37	0.881237
	1400	45		1673		1.07923	1.0118						68.0543	81.9218	-714885	4.61926	0.00292916	0.0457345	540.173	0.765916	86.0942	1.15959	1.044	52.8524	-662033	69.3505	83.2739	-696832	4.7611	0.00300129	0.0460103	504.554	0.791812	95.8208	1.33798	1.05505	61.2929	-635539	-26493.6	6.71702		75.3301	89.0964	-484218	4.53651	0.00226155	0.0510315	369.37	0.881237
	1400	50		1673		1.19218	1.0268						68.0543	81.9218	-714885	4.61926	0.00292916	0.0457345	540.173	0.765916	86.0942	1.15557	1.04214	58.6204	-656265	69.3505	83.2739	-696832	4.7611	0.00300129	0.0460103	504.554	0.791812	95.8208	1.33298	1.05299	67.9703	-628862	-27403	7.17084		75.3301	89.0964	-484218	4.53651	0.00226155	0.0510315	369.37	0.881237
[truncated: 20 more columns]
